# Supplementary material for: One-pot synthesis of CdS–reduced graphene oxide 3D composites with enhanced photocatalytic properties
Source: Royal Society of Chemistry journal article supplement (doi:10.1039/c3ce41807c), 2013-10-16
Supplement: c3ce41807c.pdf [file c3ce41807c.pdf]

# Supporting Information for

## “One-pot synthesis of CdS-reduced graphene oxide 3D composites with enhanced photocatalytic properties”

Jiahong Wang,<sup>a</sup> Shan Liang,<sup>a</sup> Liang Ma,<sup>a</sup> Xuefeng Yu,<sup>a\*</sup> Li Zhou,<sup>a,b</sup> Ququan Wang<sup>a\*</sup>

<sup>a</sup> Department of Physics, Wuhan University, Wuhan 430072, China.

<sup>b</sup> Division of Physics and Applied Physics, School of Physical and Mathematical Sciences, Nanyang Technological University, 21 Nanyang Link, Singapore 637371.

\*Corresponding authors:

E-mail addresses: yxf@whu.edu.cn (X. F. Yu); qqwang@whu.edu.cn (Q. Q. Wang)

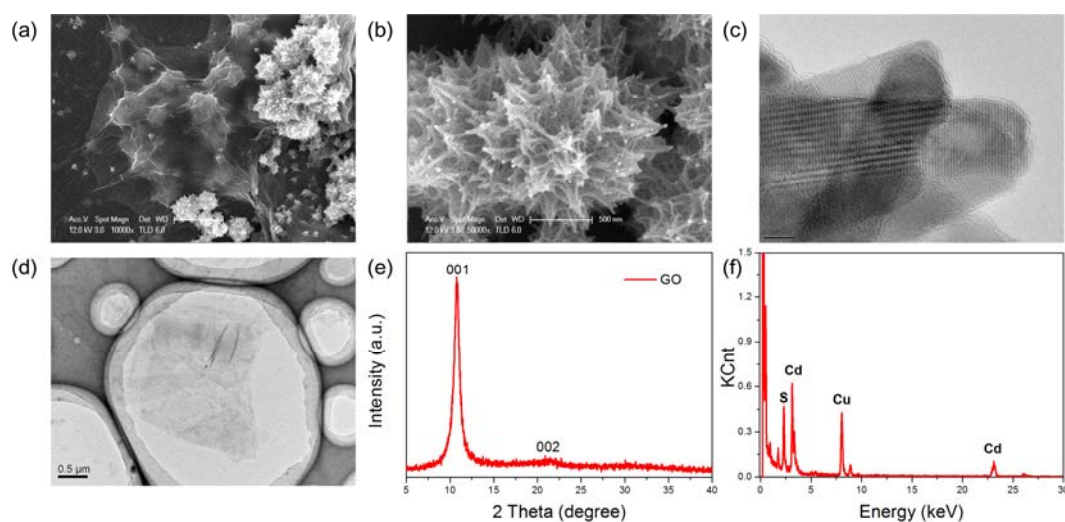

**Fig. S1** High-magnification SEM image of (a) CdS/rGO and (b) nest-like CdS particles. (c) HRTEM image of CdS/rGO. (d) TEM image of pure rGO. (e) XRD pattern of GO. (f) EDX pattern of CdS/rGO.

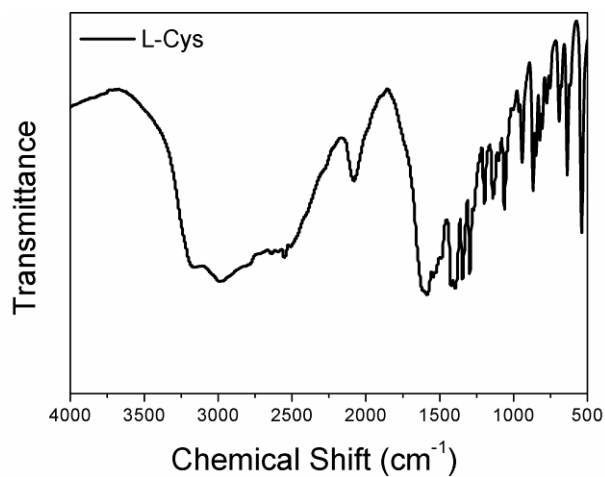

**Fig. S2** FTIR spectra of L-Cys.

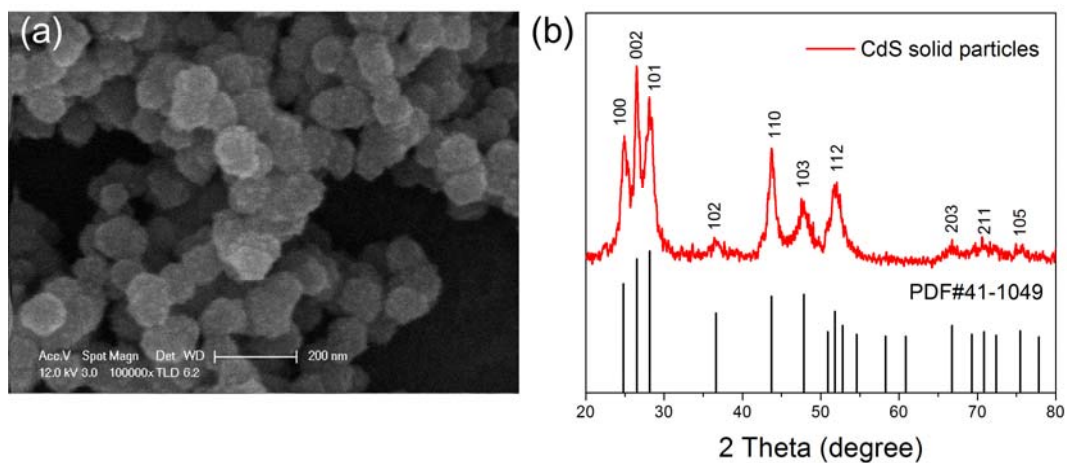

**Fig. S3** (a) SEM image and (b) XRD pattern of CdS solid particles.
